# Supplementary material for: Selective hydrodeoxygenation of tartaric acid to succinic acid
Source: Royal Society of Chemistry journal article supplement (doi:10.1039/c7cy01374d), 2017-01-01
Supplement: c7cy01374d1.pdf [file c7cy01374d1.pdf]

## ELECTRONIC SUPPLEMENTARY INFORMATION

### Selective Hydrodeoxygenation of Tartaric Acid to Succinic Acid

Jiayi Fu,<sup>ab</sup> Efterpi S. Vasiliadou,<sup>b</sup> Konstantinos A. Goulas,<sup>b</sup> Basudeb Saha<sup>b</sup> and  
Dionisios G. Vlachos<sup>ab</sup>

<sup>a</sup> Department of Chemical and Biomolecular Engineering, University of Delaware, 150  
Academy Street, Newark, Delaware 19716, United States

<sup>b</sup> Catalysis Center for Energy Innovation, University of Delaware, 221 Academy Street, Newark,  
Delaware 19716, United States

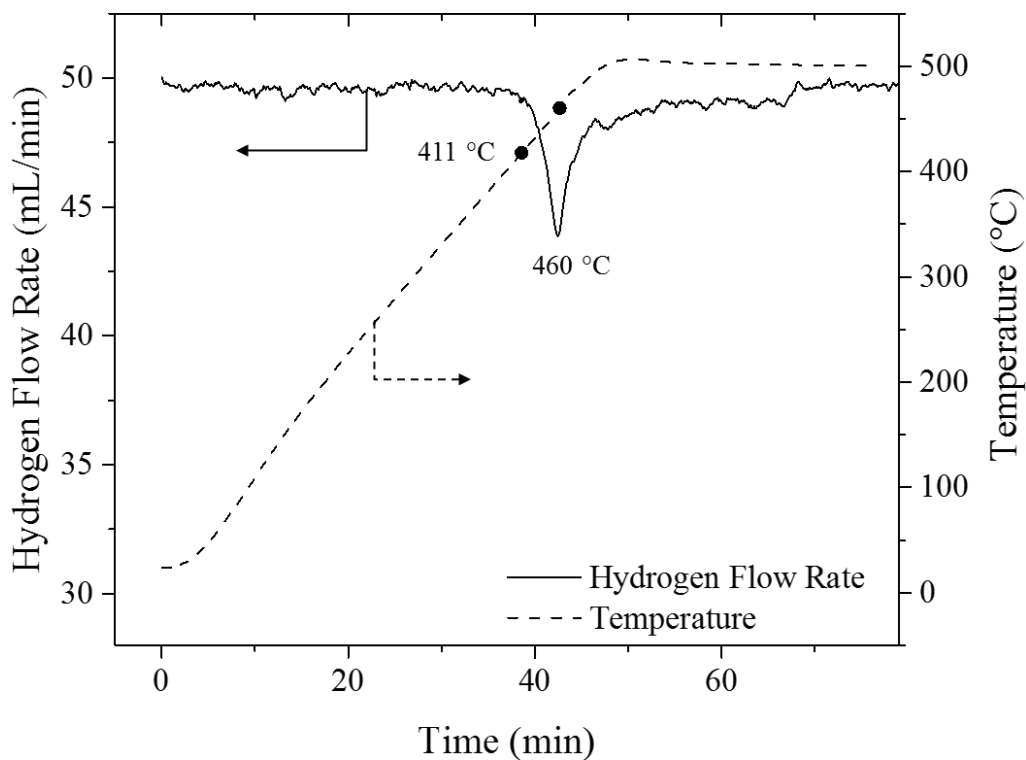

**Figure S1.** Temperature programmed reduction (TPR) profile of MoO<sub>3</sub>/BC. TPR analysis with 50 mL/min hydrogen and 10 mL/min helium, a temperature ramp is 10 °C/min and holding time at 500 °C of 30 min.

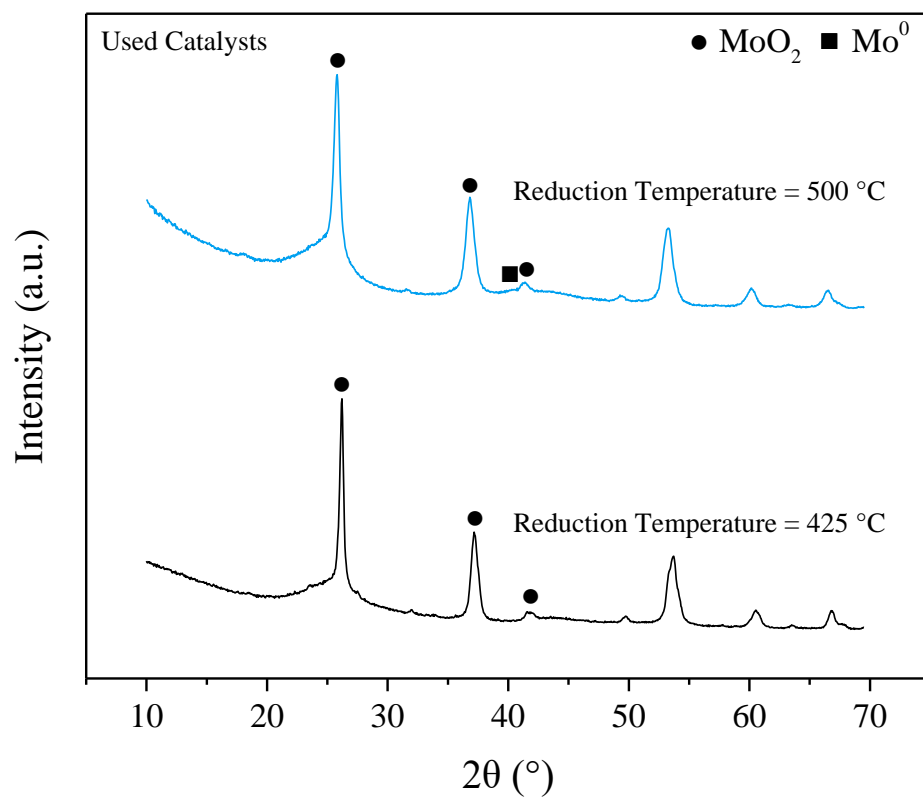

**Figure S2.** XRD pattern of the used catalysts after reaction. The catalysts were reduced before reaction.

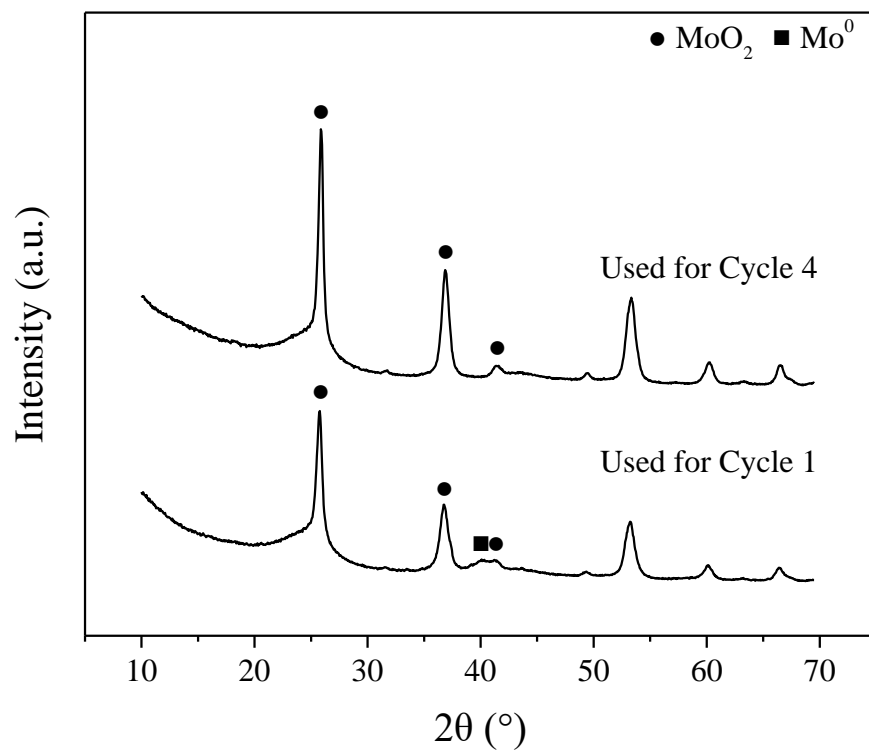

**Figure S3.** XRD patterns of the fresh and used catalysts after pre-reduction at 500 °C.
